# Supplementary material
Source: publisher site journal article supplement (https://www.dovepress.com/article/472367)
Supplement: Supplementary file 1 [file get_supplementary_file.php]

# Insights into the refusal of free screening mammograms: exploring contributing factors

## English version of the survey questionnaire

Please answer every question in the questionnaire by marking "√" as your chosen answer.

### Part One:

#### A. Eligibility criteria:

| Questions                                                                                                                    | Yes | No |
|------------------------------------------------------------------------------------------------------------------------------|-----|----|
| 1. Age 40-69 years.                                                                                                          |     |    |
| 2. Screening mammogram is indicated per the National Breast Cancer Early Detection (BCED) program criteria for average risk. |     |    |
| 3. Not Referred for screening mammogram within the last 2 years.                                                             |     |    |
| 4. Welling to participate and implied consent.                                                                               |     |    |
| 5. Able to complete the survey.                                                                                              |     |    |

#### B. Background:

6. Hospital name: \_\_\_\_\_
7. PHC name: \_\_\_\_\_
8. Age: \_\_\_\_\_ years.
9. Marital Status:  Single  Married  Widowed  Divorced
10. Level of education:  Illiterate  
 Primary school  
 Intermediate school  
 Secondary school  
 University and postgraduate
11. Employment status:  Working  Not an employee.
12. Residence:  Central areas (main cities)  Peripheral areas
13. Height (CM): \_\_\_\_\_ Weight (KG): \_\_\_\_\_
14. Have you at least done one screening mammogram in the past?  Yes  No  I don't know  
 (If the answer is No, Move to section C)
15. At what age did you have the first Mammogram: \_\_\_\_\_ years.
16. How many mammograms have you done in the past? Total number: \_\_\_\_\_
17. Do you follow the regular screening mammogram every 1-2 years?  Yes  No  I don't know
18. Time since the last mammogram:  0–2 years ago  3–9 years ago  >9 years

#### C. Knowledge:

| Questions                                                                                       | Yes | No | I don't know |
|-------------------------------------------------------------------------------------------------|-----|----|--------------|
| 19. Mammography is the standard method of identifying asymptomatic breast cancer's early stages |     |    |              |
| 20. In Qassim, we have a free mammogram screening program                                       |     |    |              |

21. At which age a woman should start having mammograms:
- A.  Above 40
- B.  Above 50
- C.  Above 60
- D.  I don't know
22. How often should a woman undergo mammograms?
- A.  Once in a lifetime
- B.  Every 1-2 years
- C.  Every 5 years
- D.  I don't know

**Part two:**

| Questions                                                 | Yes | No |
|-----------------------------------------------------------|-----|----|
| 23. Do you agree to a referral for a screening mammogram? |     |    |

If you answered "No" to the previous question, what are the reasons (Choose all that apply)?

| Reasons for refusal                                       | Yes | No |
|-----------------------------------------------------------|-----|----|
| 24. Not need it because of no lump                        |     |    |
| 25. Not need it because I am young                        |     |    |
| 26. Previously undergone mammogram                        |     |    |
| 27. Fear receiving bad news                               |     |    |
| 28. Fear of radiation exposure                            |     |    |
| 29. Fear of pain during a mammogram                       |     |    |
| 30. Embarrassed about breast exposure                     |     |    |
| 31. Difficulty reaching the mammogram site                |     |    |
| 32. Religious restrictions on exposure                    |     |    |
| 33. Lack of time due to a busy schedule                   |     |    |
| 34. Fear of hospital facilities                           |     |    |
| 35. Previous negative experience with mammogram screening |     |    |
| 36. Other reasons                                         |     |    |

37. If there are any other reasons for your mammogram refusal, please specify (list if more than one)

---



---



---



---

38. Would you reconsider screening mammography if you have: (Choose all that apply)?

| Options                                            | Agree | Somehow | Disagree |
|----------------------------------------------------|-------|---------|----------|
| A. Female healthcare examiner                      |       |         |          |
| B. Free transportation to the mammogram center     |       |         |          |
| C. Appointment during non-working hours            |       |         |          |
| D. Sick leave for a mammogram during working hours |       |         |          |
| E. A counseling session with a healthcare provider |       |         |          |

39. If any other reasons could make you reconsider screening mammography, please specify (list if more than one)

---



---



---

## الكشف المبكر عن سرطان الثدي بين الفئة المستهدفة من النساء السعوديات في القصيم، المملكة العربية السعودية

### النسخة العربية من الاستمارة

يرجى الإجابة على كل سؤال في الاستبيان عن طريق وضع علامة "√" على الإجابة التي تختارها.  
الجزء الأول:

| لا | نعم | أ. معايير الأهلية: معايير التضمين                                               |
|----|-----|---------------------------------------------------------------------------------|
|    |     | 1. العمر 40-69 سنة                                                              |
|    |     | 2. الفحص بالمماموغرام مطلوب وفقاً لمعايير الفحص بالمماموغرام في البرنامج الوطني |
|    |     | 3. لا توجد إحالة للفحص بالمماموغرام خلال العامين الماضيين                       |
|    |     | 4. الرغبة في المشاركة مع الموافقة الضمنية                                       |
|    |     | 5. القدرة على اكمال المسح                                                       |

### ب. الخلفية العامة:

6. اسم المستشفى: \_\_\_\_\_
7. اسم مركز الرعاية الصحية الأولية: \_\_\_\_\_
8. العمر: \_\_\_\_\_ سنة
9. الحالة الاجتماعية:  عزباء  متزوجة  أرملة  مطلقة.
10. المستوى التعليمي:  أمي  ابتدائي  متوسط  ثانوي  جامعي أو الدراسات العليا
11. الوضع الوظيفي:  موظفة  غير موظفة
12. السكن:  المدن الرئيسية  قرية او مركز
13. الوزن (كجم): \_\_\_\_\_ الطول (سم): \_\_\_\_\_
14. هل قمت بإجراء الفحص بالمماموغرام مرة واحدة على الأقل في الماضي؟  نعم  لا  لا اعرف (إذا كانت الإجابة لا، انتقل للقسم "ج")
15. كم كان العمر عند أول فحص بالمماموغرام: \_\_\_\_\_ سنة
16. كم مرة قمتي بالفحص بالمماموغرام في الماضي؟ الرقم الإجمالي \_\_\_\_\_
17. هل تعملين الفحص بالمماموغرام بانتظام كل سنتين؟  نعم  لا  لا اعرف
18. منذ متى كان آخر فحص بالمماموغرام: 0-2 سنوات  3-9 سنوات  أكثر من 9 سنوات

### ج. المعرفة حول الفحص بالمماموغرام:

| لا اعرف | لا | نعم | الاسئلة                                                                                     |
|---------|----|-----|---------------------------------------------------------------------------------------------|
|         |    |     | 19. التصوير بالمماموغرام هو الطريقة القياسية لتحديد المراحل المبكرة لسرطان الثدي بدون أعراض |
|         |    |     | 20. في القصيم، يوجد برنامج مجاني لفحص المماموغرام                                           |

21. ما هو العمر الذي يجب أن تبدأ عنده المرأة في إجراء الفحص بالمماموغرام:

- أ.  فوق 40
- ب.  فوق 50
- ج.  فوق 60
- د.  لا أعرف

22. ما هو عدد المرات التي يجب أن تجري المرأة الفحص بالمماموغرام:

- أ.  مرة واحدة
- ب.  كل 1-2 سنوات
- ج.  كل 5 سنوات
- د.  لا أعرف

الجزء الثاني:

| لا | نعم | الاسئلة                                      |
|----|-----|----------------------------------------------|
|    |     | 23. هل توافقين على الإحالة لفحص المامو غرام؟ |

إذا كانت إجابتك "لا" على السؤال السابق، فما هي الأسباب (حددي كل ما ينطبق).

| لا | نعم | أسباب الرفض (حددي كل ما ينطبق)                       |
|----|-----|------------------------------------------------------|
|    |     | 24. لست بحاجة إلى الفحص بسبب عدم وجود كتله بالثدي    |
|    |     | 25. لست بحاجة إلى الفحص لأنني صغيره بالعمر           |
|    |     | 26. خضعت سابقا للفحص                                 |
|    |     | 27. الخوف من تلقي أخبار سيئة                         |
|    |     | 28. الخوف من التعرض للإشعاع                          |
|    |     | 29. الخوف من الألم أثناء الفحص بالمامو غرام          |
|    |     | 30. أرفض كشف الثدي بسبب الحياء                       |
|    |     | 31. صعوبة الوصول إلى موقع التصوير الثدي بالمامو غرام |
|    |     | 32. أرفض كشف الثدي بسبب القيود الدينية               |
|    |     | 33. ليس لدي وقت للقيام بذلك (منشغلة)                 |
|    |     | 34. أخشى الذهاب إلى مرافق المستشفى                   |
|    |     | 35. كانت لي تجربة سابقة غير مرضية مع فحص المامو غرام |
|    |     | 36. أسباب أخرى                                       |

37. إذا كانت هناك أي أسباب أخرى لرفضك للفحص بالمامو غرام، يرجى كتابتها

---



---



---



---

38. هل يمكنك إعادة النظر بالموافقة لإجراء الفحص بالمامو غرام إذا: (حددي كل ما ينطبق)؟

| الخيارات                                                   | موافق | محايد | غير موافق |
|------------------------------------------------------------|-------|-------|-----------|
| أ. كانت التي تعمل الفحص أنثى                               |       |       |           |
| ب. توفر وسيلة نقل مجانية إلى مركز تصوير الثدي بالمامو غرام |       |       |           |
| ج. كان الفحص متاحا في غير أوقات العمل                      |       |       |           |
| د. منح إجازة مرضية خلال ساعات العمل                        |       |       |           |
| هـ. توفر جلسة استشارية مع مقدم رعاية صحية                  |       |       |           |

39. إذا كانت هناك أي أسباب أخرى تدفعك إلى إعادة النظر في فحص المامو غرام، فيرجى كتابتها

---



---



---
